# Supplementary material for: A self-assembly solvothermal synthesis of SiMoVn@[Cu6O(TZI)3(H2O)6]4·nH2O for the efficient selective oxidation of various alkylbenzenes
Source: Royal Society of Chemistry journal article supplement (doi:10.1039/d2nj00308b), 2022-01-01
Supplement: d2nj00308b1.pdf [file d2nj00308b1.pdf]

## Supporting Information

**Self-assembly solvothermal synthesis of  
SiMoV<sub>n</sub>@[Cu<sub>6</sub>O(TZI)<sub>3</sub>(H<sub>2</sub>O)<sub>6</sub>]<sub>4</sub>·nH<sub>2</sub>O for efficient selective  
oxidation of various alkylbenzene**

Jiabin Liu, Yuxiang Xin, Yiyang Bai, Wei She, Jing Wang, Gaungming Li\*

*Key Laboratory of Functional Inorganic Material Chemistry (MOE); School of Chemistry and  
Materials Science, Heilongjiang University, Harbin, 150080, Heilongjiang, China. E-mail:  
gmli@hlju.edu.cn*

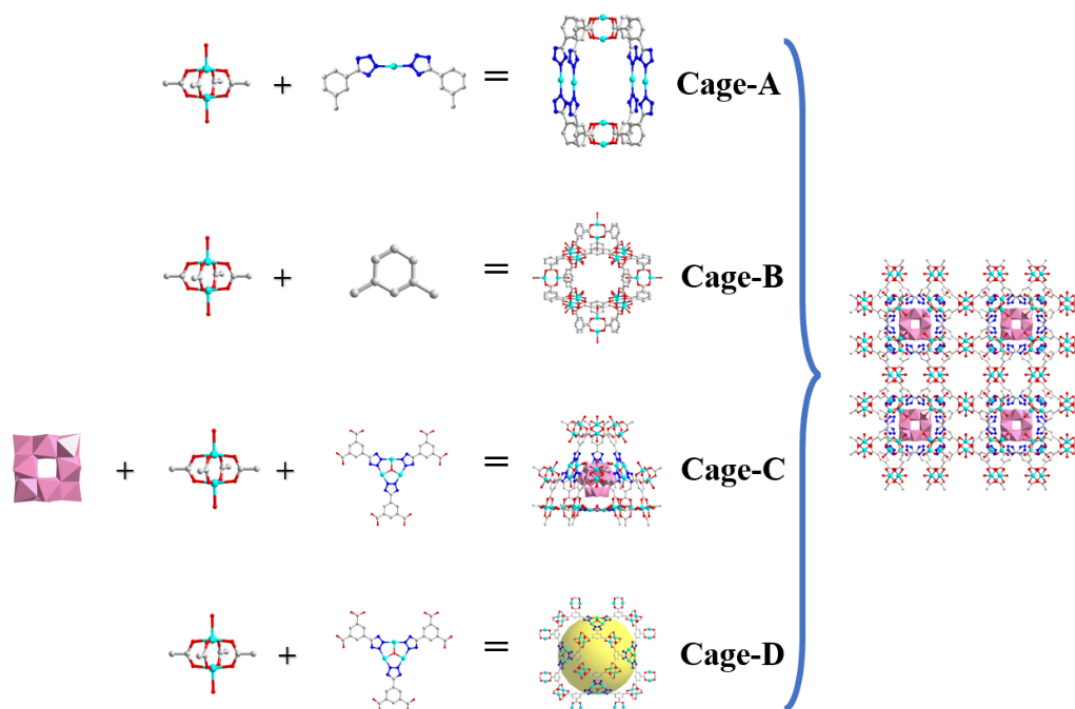

**Fig. S1** Composition of four types of cages in complexes 1-3.

**Table S1.** Crystallographic data for complex 2.

| Parameters                                    | 2                                                                |
|-----------------------------------------------|------------------------------------------------------------------|
| Empirical formula                             | $C_{108}H_{36}Cu_{24}Mo_{10}N_{48}O_{118}Si_1V_2$                |
| CCDC No.                                      | 2054498                                                          |
| Formula weight                                | 6476.18                                                          |
| Crystal system                                | cubic                                                            |
| Space group                                   | $Fm\bar{3}m$                                                     |
| Unit cell                                     | $a=b=c= 44.361(5) \text{ \AA}$<br>$\alpha=\beta=\gamma=90^\circ$ |
| Volume                                        | $87298(30) \text{ \AA}^3$                                        |
| Z                                             | 8                                                                |
| Density (Calcd)                               | $0.985 \text{ g}\cdot\text{cm}^{-3}$                             |
| Temperature                                   | 293.00 (2) K                                                     |
| Wavelength                                    | $0.71069 \text{ \AA}$                                            |
| Reflections collected                         | 3732                                                             |
| $\mu$                                         | $1.512 \text{ mm}^{-1}$                                          |
| $F(000)$                                      | 25024                                                            |
| Final $R_1^a$ , $wR_2^b$ [ $I > 2\sigma(I)$ ] | 0.0858, 0.1140                                                   |
| Final $R_1^a$ , $wR_2^b$ (all data)           | 0.2228, 0.2640                                                   |
| GOF on $F^2$                                  | 1.064                                                            |

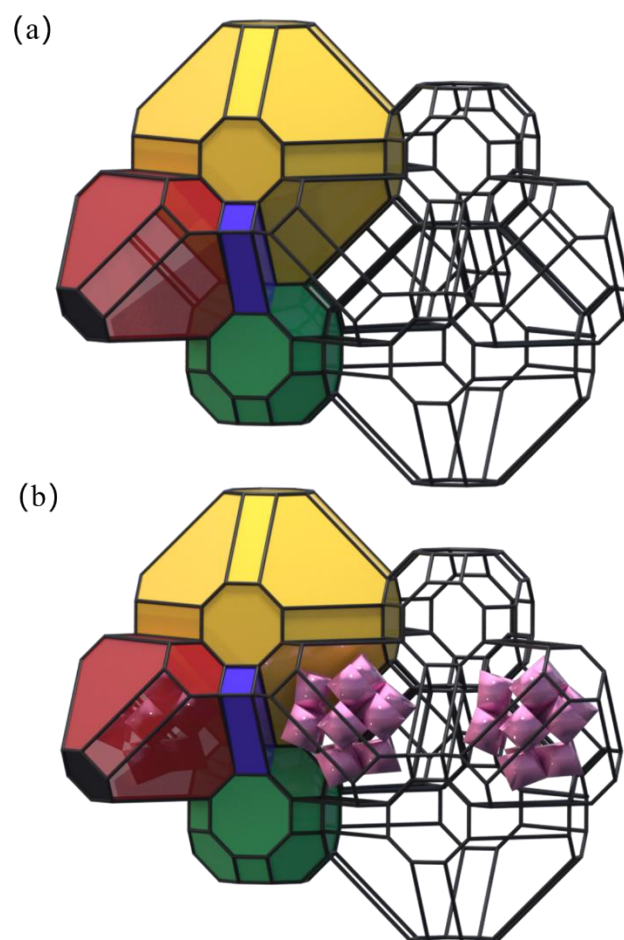

**Fig. S2** Complex 2 framework with *lta* topology : (a) Without SiMoV<sub>2</sub>; (b) Containing SiMoV<sub>2</sub>.

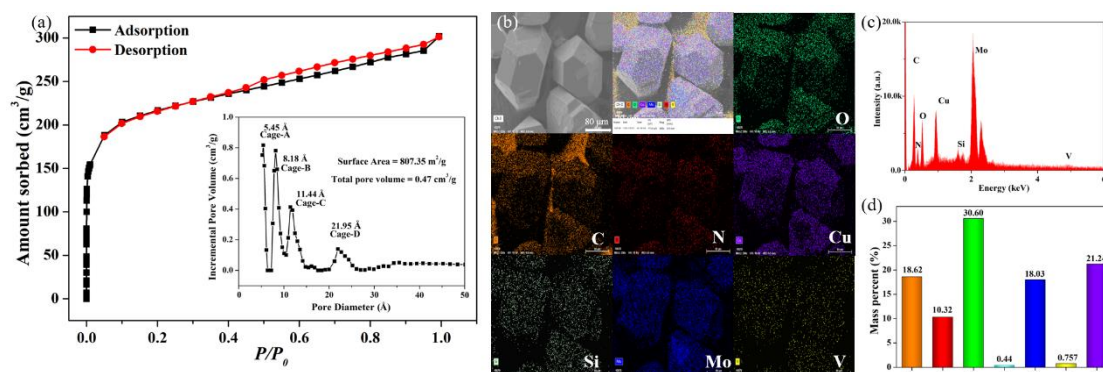

**Fig. S3** (a) Nitrogen isothermal adsorption curve and pore size distribution of complex 1; (b) SEM image and EDS mappings of complex 1; (c) EDX spectrum; (d) The values of elements of complex 1.

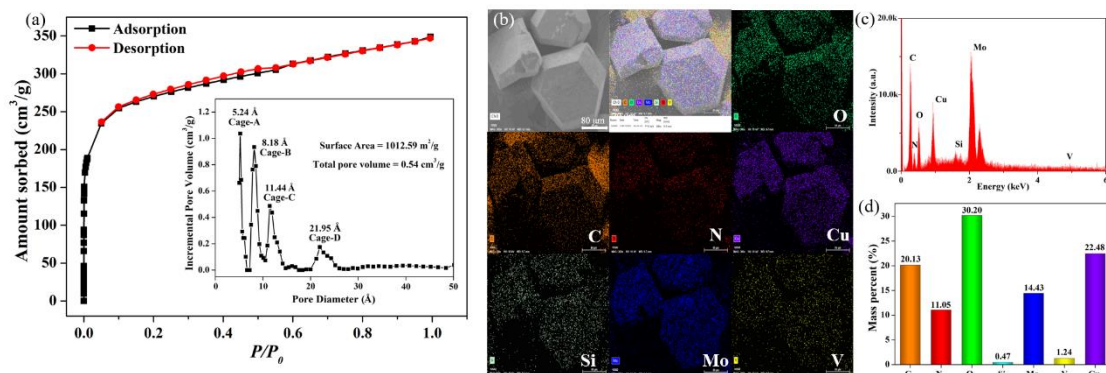

**Fig. S4** (a) Nitrogen isothermal adsorption curve and pore size distribution of complex **2**; (b) SEM image and EDS mappings of complex **2**; (c) EDX spectrum; (d) The values of elements of complex **2**.

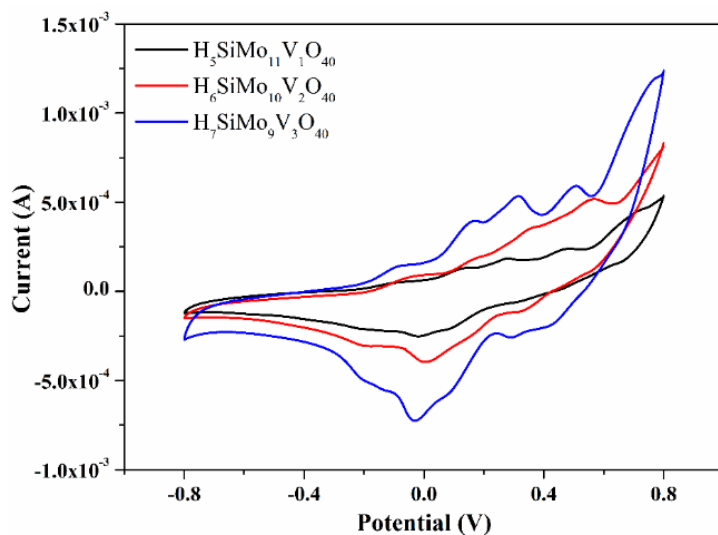

**Fig. S5** Cyclic voltammograms of SiMoV<sub>1/2/3</sub>

### <sup>1</sup>H NMR, <sup>13</sup>C NMR of catalytic oxidation products of complex **3**

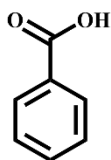

**Benzoic acid**

<sup>1</sup>H NMR (400 MHz, DMSO-*d*<sub>6</sub>) δ 12.97 (s, 1H, -COOH), 7.96 (d, *J* = 8.0 Hz, 2H, Ph-H), 7.60 (t, *J* = 7.3 Hz, 1H, Ph-H), 7.48 (t, *J* = 7.6 Hz, 2H, Ph-H).

<sup>13</sup>C NMR (101 MHz, DMSO-*d*<sub>6</sub>) δ 167.8 (-COOH), 133.3 (Ph-C), 131.2 (Ph-C), 129.7 (Ph-C), 129.0 (Ph-C).

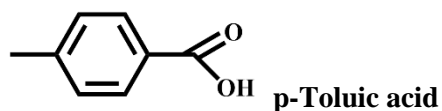

**$^1\text{H NMR}$**  (400 MHz, DMSO- $d_6$ )  $\delta$  12.80 (s, 1H, -COOH), 7.85 (d,  $J = 8.0$  Hz, 2H, Ph-H), 7.24 (d,  $J = 8.0$  Hz, 2H, Ph-H), 2.32 (s, 3H, -CH<sub>3</sub>).

**$^{13}\text{C NMR}$**  (101 MHz, DMSO- $d_6$ )  $\delta$  167.8 (-COOH), 143.4 (Ph-C), 129.8 (Ph-C), 129.5 (Ph-C), 128.5 (Ph-C), 21.5 (-CH<sub>3</sub>).

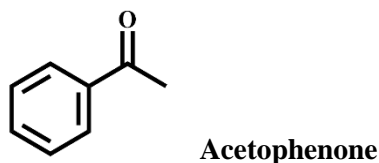

**$^1\text{H NMR}$**  (400 MHz, Chloroform- $d$ )  $\delta$  7.84 (d,  $J = 7.7$  Hz, 2H, Ph-H), 7.43 (t,  $J = 7.3$  Hz, 1H, Ph-H), 7.33 (t,  $J = 7.6$  Hz, 2H, Ph-H), 2.46 (s, 3H, -CH<sub>3</sub>).

**$^{13}\text{C NMR}$**  (101 MHz, Chloroform- $d$ )  $\delta$  197.8 (-CO-), 137.0 (Ph-C), 133.0 (Ph-C), 128.5 (Ph-C), 128.2 (Ph-C), 26.4 (-CH<sub>3</sub>).

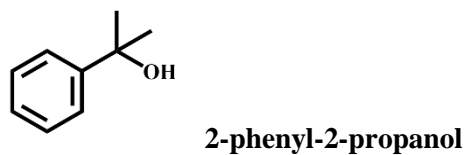

**$^1\text{H NMR}$**  (400 MHz, DMSO- $d_6$ )  $\delta$  7.49 (d,  $J = 7.7$  Hz, 2H, Ph-H), 7.30 (t,  $J = 7.6$  Hz, 2H, Ph-H), 7.19 (t,  $J = 7.0$  Hz, 1H, Ph-H), 5.03 (s, 1H, -OH), 1.45 (s, 6H, -CH<sub>3</sub>).

**$^{13}\text{C NMR}$**  (101 MHz, DMSO- $d_6$ )  $\delta$  151.0 (Ph-C), 128.2 (Ph-C), 126.3 (Ph-C), 125.0 (Ph-C), 71.1 (C-OH), 32.4 (-CH<sub>3</sub>).

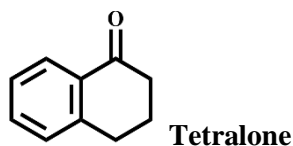

**$^1\text{H NMR}$**  (400 MHz, Chloroform- $d$ )  $\delta$  7.90 (d,  $J = 9.4$  Hz, 1H Ph-H), 7.38 – 7.21 (m, 1H Ph-H), 7.21 – 6.96 (m, 2H Ph-H), 2.92 – 2.65 (m, 2H, -CH<sub>2</sub>), 2.59 – 2.38 (m, 2H, -CH<sub>2</sub>), 2.10 – 1.78 (m, 2H, -CH<sub>2</sub>).

**$^{13}\text{C NMR}$**  (101 MHz, Chloroform- $d$ )  $\delta$  197.9 (-CO-), 144.4 (Ph-C), 133.2 (Ph-C), 132.5 (Ph-C), 128.7 (Ph-C), 126.9 (Ph-C), 126.4 (Ph-C), 39.0 (-CH<sub>2</sub>), 29.5 (-CH<sub>2</sub>), 23.2 (-CH<sub>2</sub>).

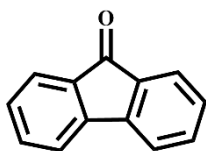

**Fluorenone**

$^1\text{H NMR}$  (400 MHz, Chloroform-*d*)  $\delta$  7.66 (d,  $J = 7.3$  Hz, 2H, Ph-H), 7.49 (q,  $J = 7.5$  Hz, 4H, Ph-H), 7.30 (t,  $J = 7.1$  Hz, 2H, Ph-H).

$^{13}\text{C NMR}$  (101 MHz, Chloroform-*d*)  $\delta$  193.9 (-CO-), 144.4 (Ph-C), 134.7 (Ph-C), 134.1 (Ph-C), 129.1 (Ph-C), 124.3 (Ph-C), 120.3 (Ph-C).

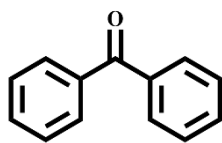

**Benzophenone**

$^1\text{H NMR}$  (400 MHz, Chloroform-*d*)  $\delta$  7.83 (d,  $J = 7.8$  Hz, 4H, Ph-H), 7.62 (t,  $J = 7.3$  Hz, 2H, Ph-H), 7.51 (t,  $J = 7.5$  Hz, 4H, Ph-H).

$^{13}\text{C NMR}$  (101 MHz, Chloroform-*d*)  $\delta$  196.8 (-CO-), 137.6 (Ph-C), 132.5 (Ph-C), 130.1 (Ph-C), 128.3 (Ph-C).

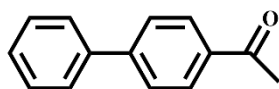

**4-Phenylacetophenone**

$^1\text{H NMR}$  (400 MHz, Chloroform-*d*)  $\delta$  8.06 (d,  $J = 8.1$  Hz, 2H, Ph-H), 7.72 (d,  $J = 8.1$  Hz, 2H, Ph-H), 7.66 (d,  $J = 7.6$  Hz, 2H, Ph-H), 7.50 (t,  $J = 7.4$  Hz, 2H, Ph-H), 7.43 (t,  $J = 7.2$  Hz, 1H, Ph-H), 2.67 (s, 3H, -CH<sub>3</sub>).

$^{13}\text{C NMR}$  (101 MHz, Chloroform-*d*)  $\delta$  197.8 (-CO-), 145.8 (Ph-C), 139.9 (Ph-C), 135.9 (Ph-C), 129.0 (Ph-C), 128.9 (Ph-C), 128.3 (Ph-C), 127.3 (Ph-C), 127.3 (Ph-C), 26.7 (-CH<sub>3</sub>).

**$^1\text{H}$  NMR,  $^{13}\text{C}$  NMR and MS spectra for catalytic products of complex 3**

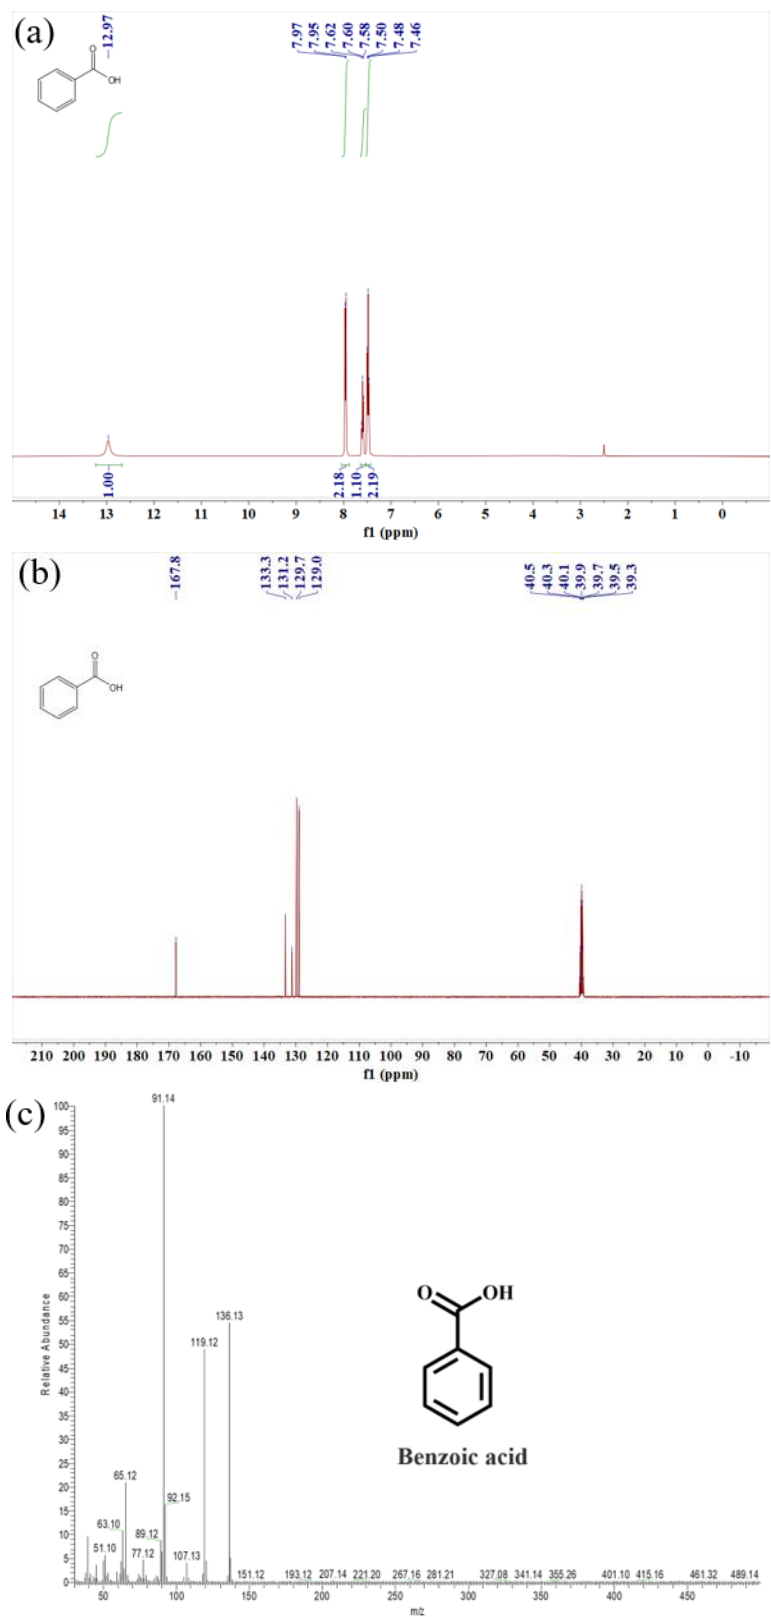

**Fig. S6**  $^1\text{H}$  NMR (a),  $^{13}\text{C}$  NMR (b) and MS (c) spectra of benzoic acid

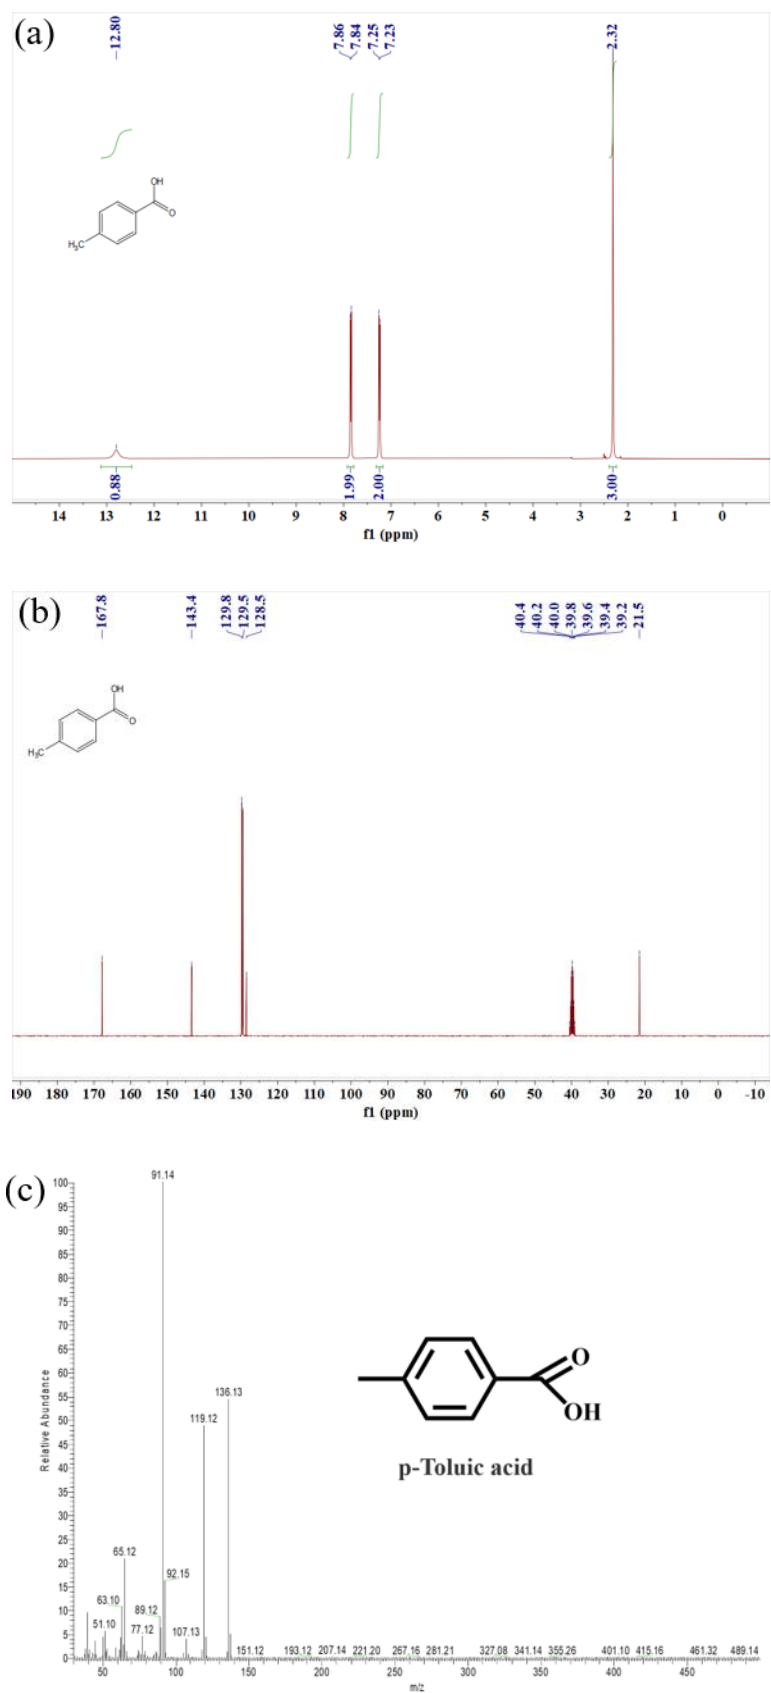

**Fig. S7** <sup>1</sup>H NMR (a), <sup>13</sup>C NMR (b) and MS (c) spectra of p-toluic-acid



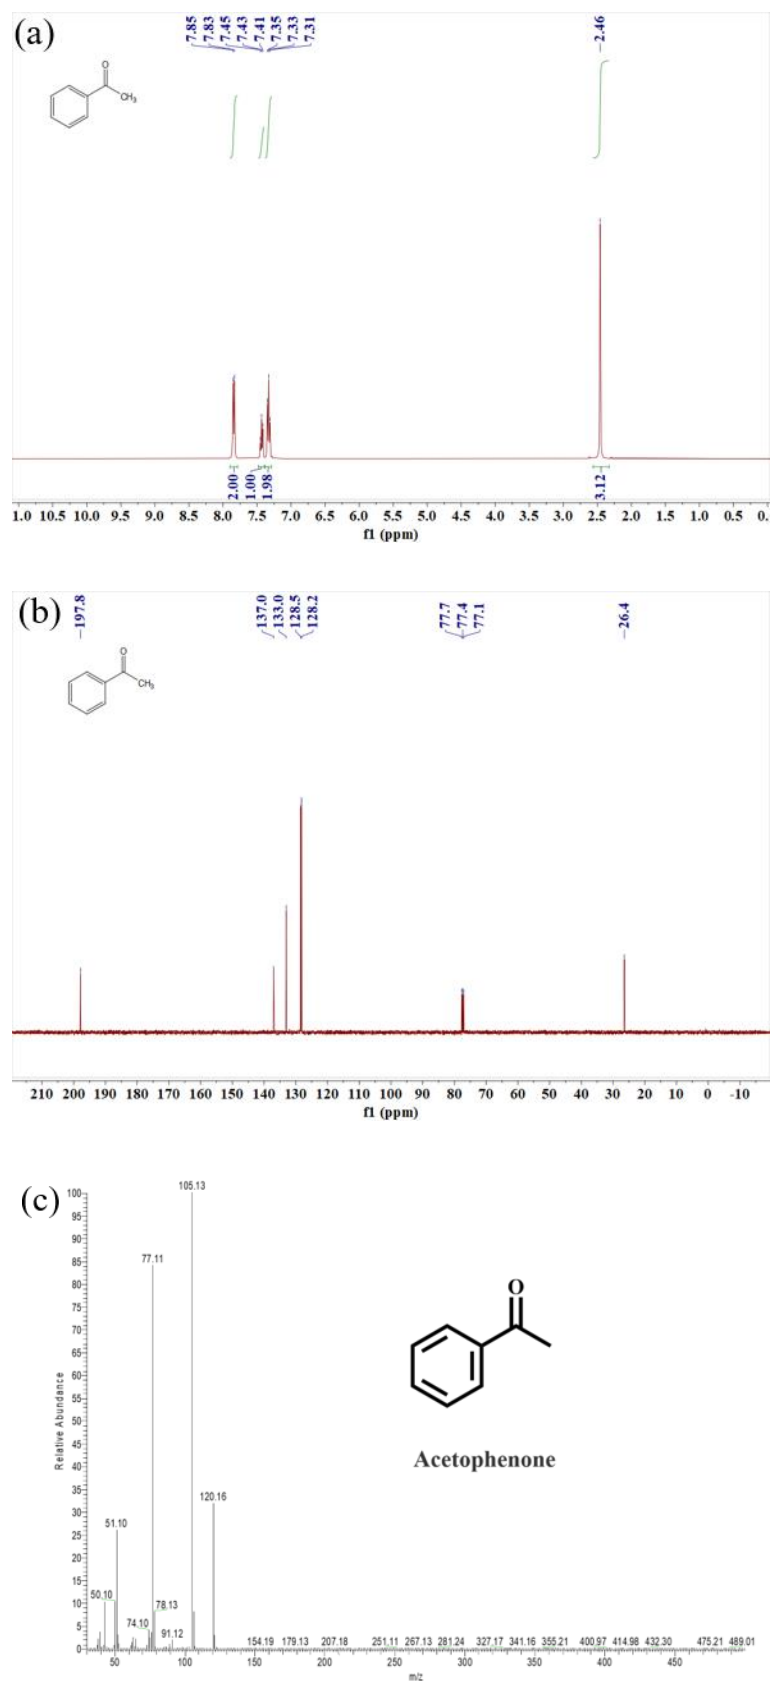

**Fig. S8** <sup>1</sup>H NMR (a), <sup>13</sup>C NMR (b) and MS (c) spectra of acetophenone

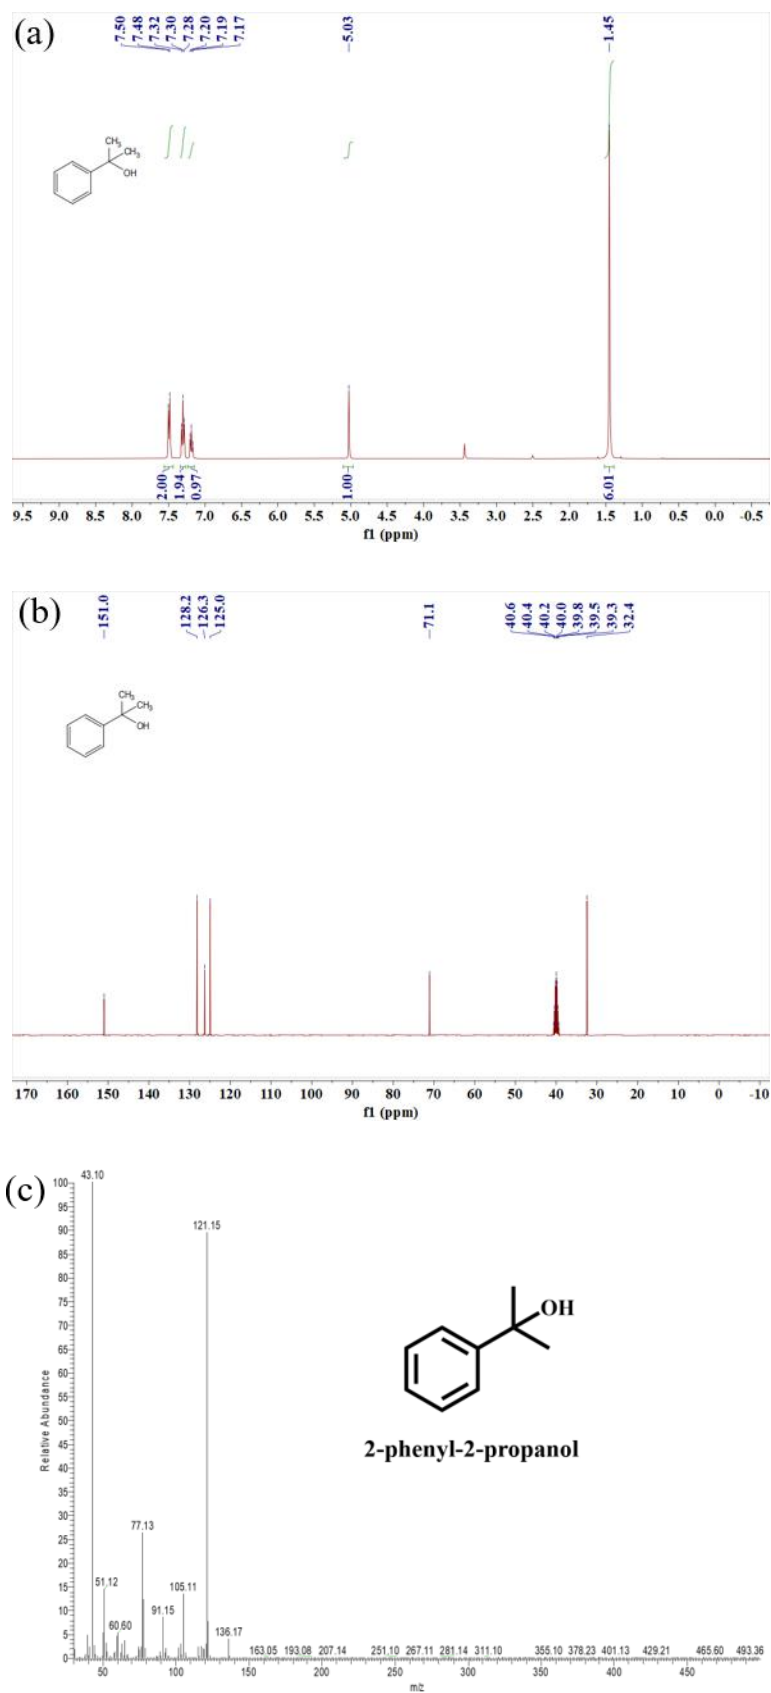

**Fig. S9** <sup>1</sup>H NMR (a), <sup>13</sup>C NMR (b) and MS (c) spectra of 2-phenyl-2-propanol

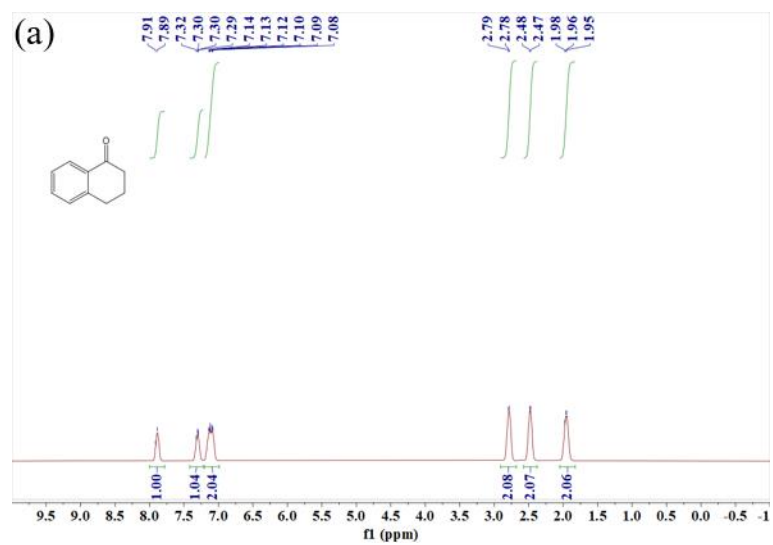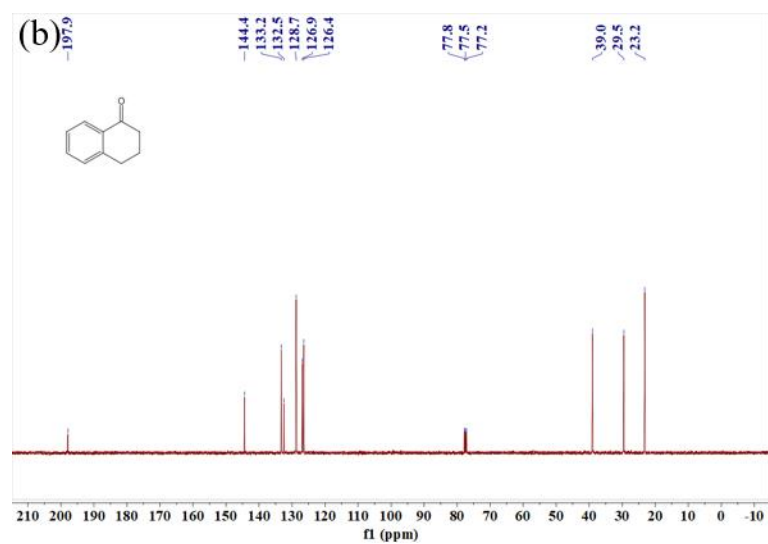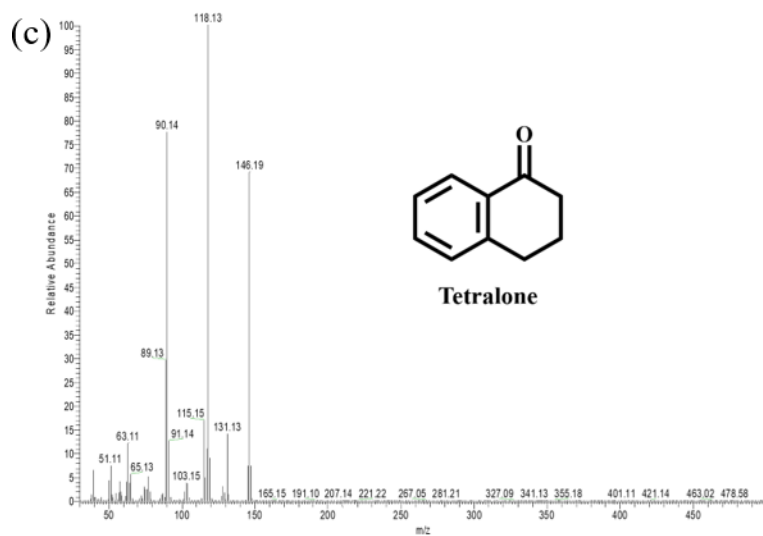

Fig. S10 <sup>1</sup>H NMR (a), <sup>13</sup>C NMR (b) and MS (c) spectra of tetralone

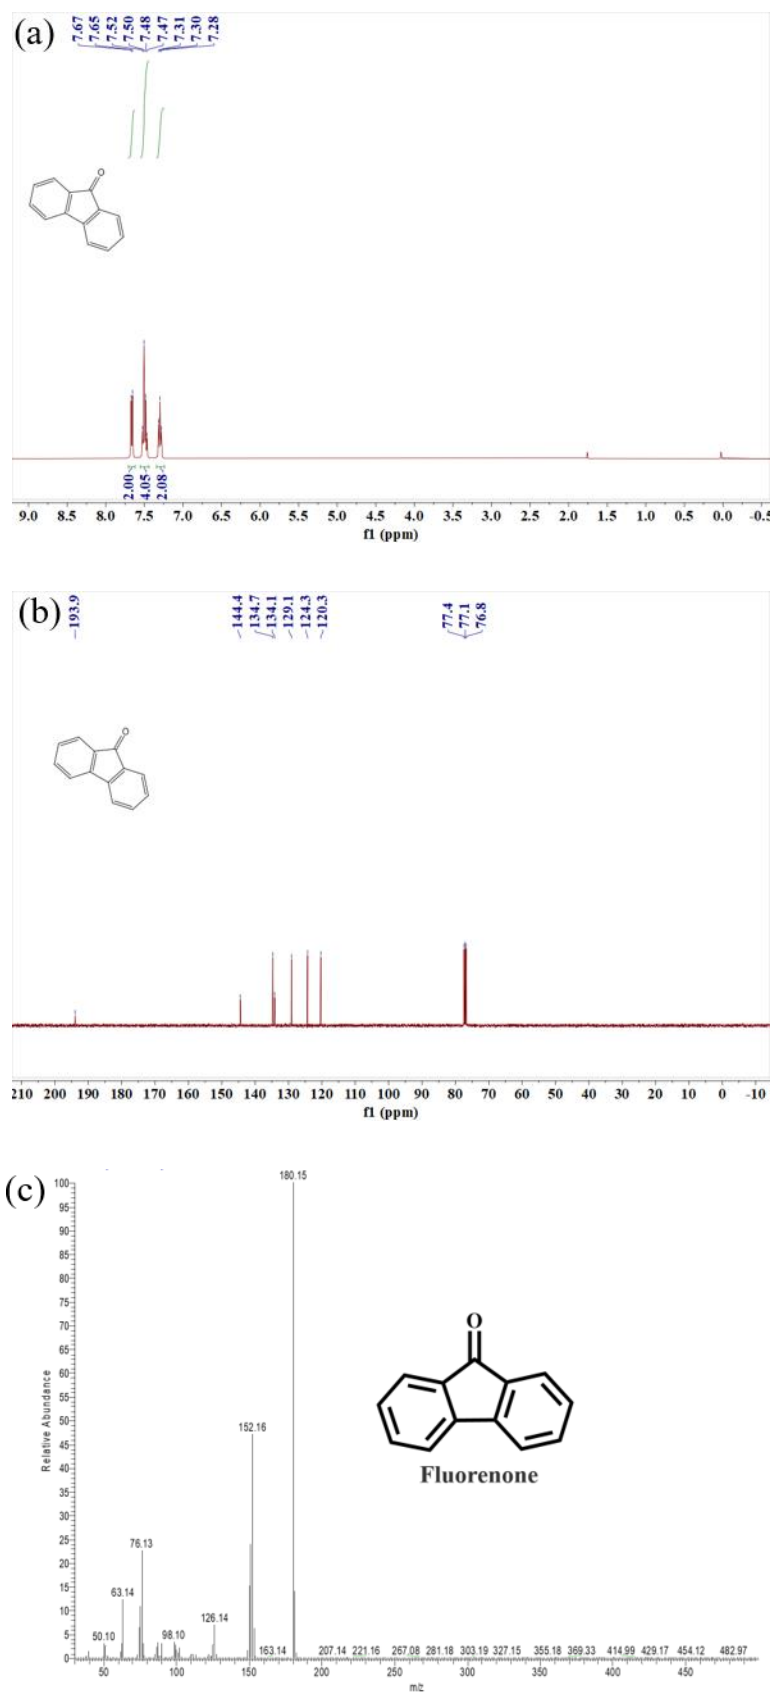

**Fig. S11** <sup>1</sup>H NMR (a), <sup>13</sup>C NMR (b) and MS (c) spectra of fluorenone

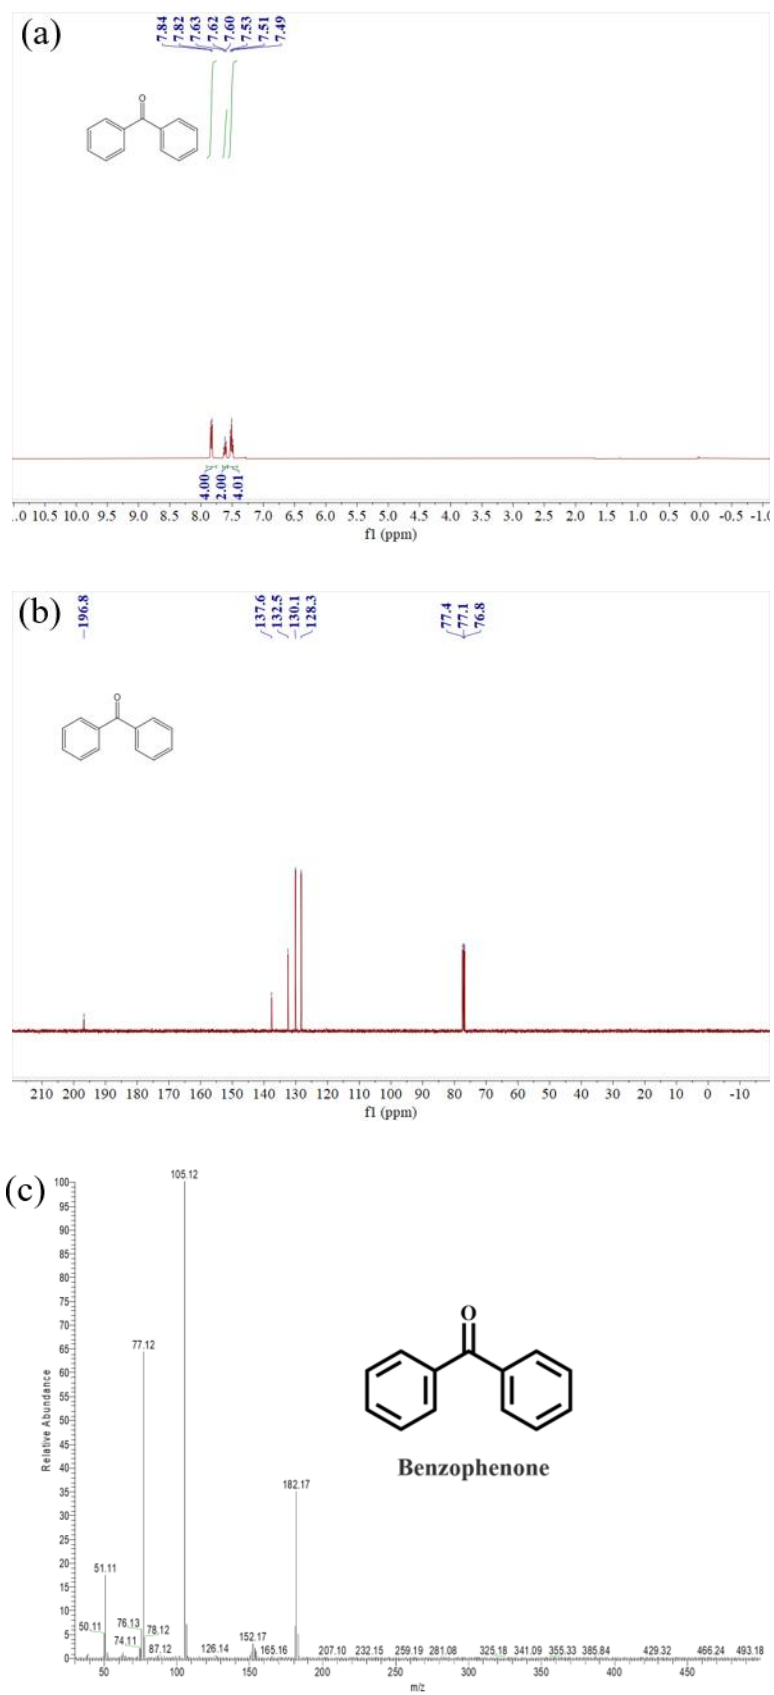

**Fig. S12** <sup>1</sup>H NMR (a), <sup>13</sup>C NMR (b) and MS (c) spectra of benzophenone

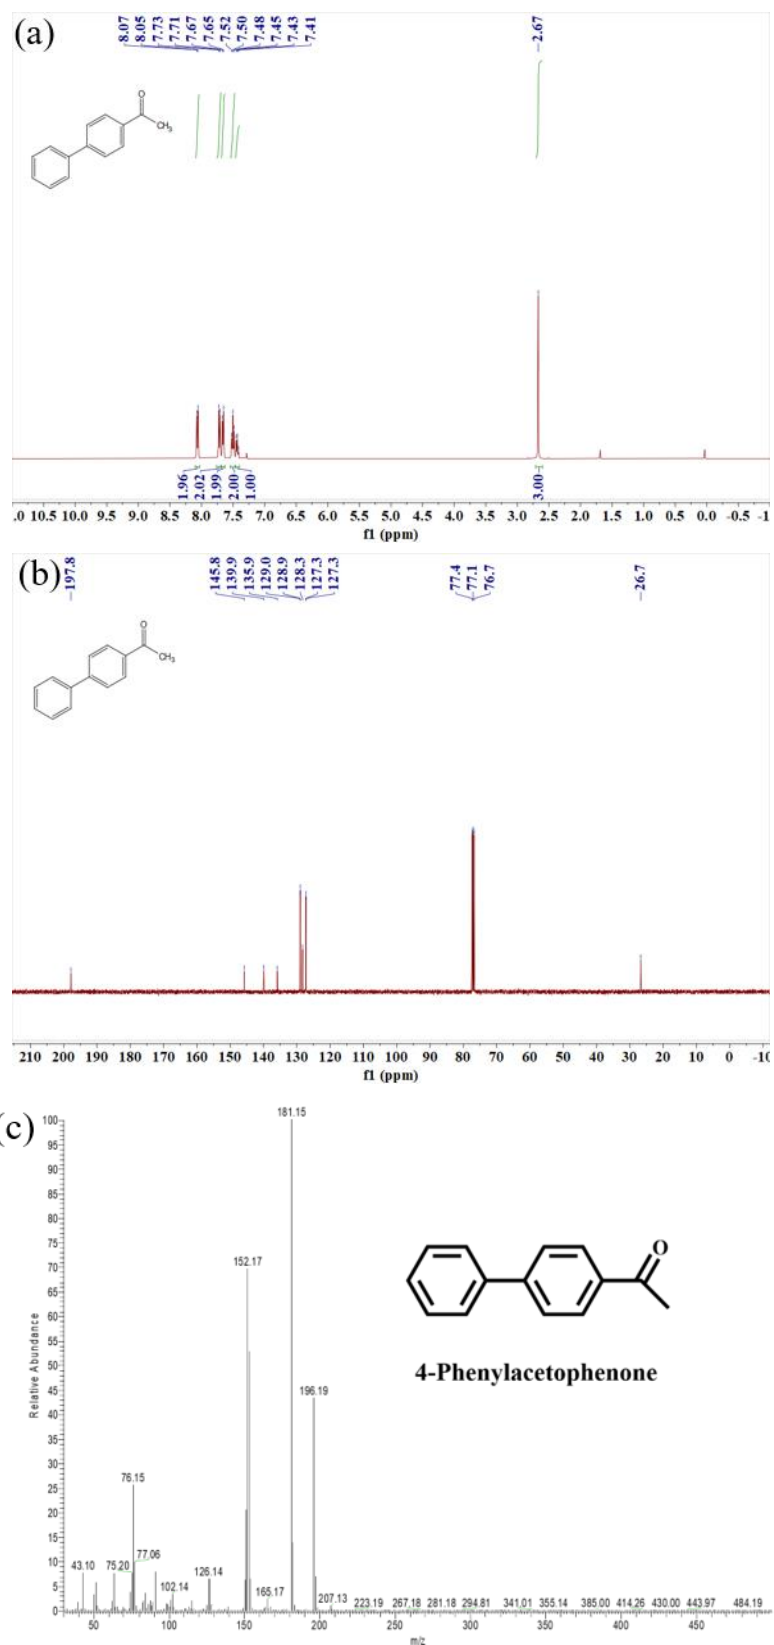

**Fig. S13** <sup>1</sup>H NMR (a), <sup>13</sup>C NMR (b) and MS (c) spectra of 4-phenylacetophenone

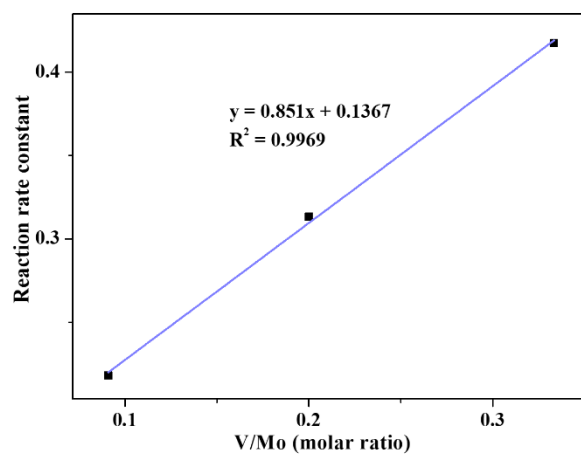

**Fig. S14** Reaction rates as a function of V/Mo molar ratio in complexes 1-3.

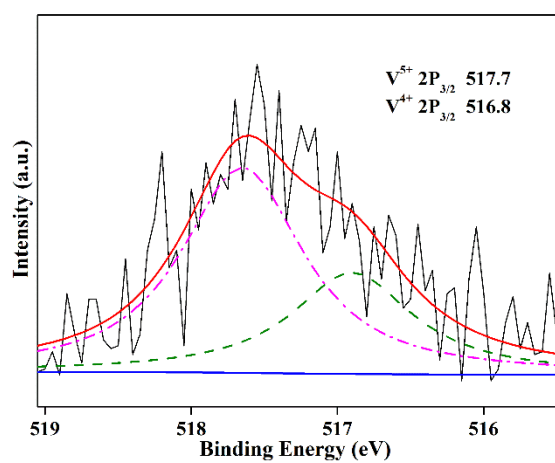

**Fig. S15** Fluxion of  $V^{5+}$  and  $V^{4+}$  ions evidenced by XPS spectrum.
